# Supplementary material for: Associations of the Single Bovine Embryo Growth Media Metabolome with Successful Pregnancy
Source: Preprints.org preprint supplement (doi:10.20944/preprints202312.2281.v1), 2023-12-29
Supplement: Supplementary file 1 [file supplementary]

## Sheet: Table_1vs2vs3_kruskal
		Supplemental Table S1. The list of metabolites measured with the AbsoluteIDQ® p180 Kit that were included in the statistical analyses, along with their corresponding statistical significances.
			value_1_ET_P BL	value_2_ET_NP BL	value_3_Contol	p_1vs2	p_1vs3	p_2vs3	p-value	test
	Acylcarnitines
	C0	Carnitine	1.476 (±0.142)	1.53 (±0.119)	1.39 (±0.111)	0.609795	0.436798	0.135886	0.16	ANOVA
	C2	Acetylcarnitine	0.257 (±0.024)	0.248 (±0.033)	0.231 (±0.017)	0.738435	0.206776	0.504138	0.23	ANOVA
	C3	Propionylcarnitine	0.055 (±0.007)	0.056 (±0.009)	0.051 (±0.007)	0.972213	0.682496	0.579595	0.6	ANOVA
	C4-OH (and C3-DC)	Hydroxybutyrylcarnitine	0.021 (±0.003)	0.019 (±0.003)	0.017 (±0.002)	0.260749	0.0334905	0.375097	0.037	ANOVA
	C3-OH	Hydroxypropionylcarnitine	0.03 (0.028-0.034)	0.03 (0.028-0.034)	0.03 (0.021-0.03)	1	0.0786021	0.103407	0.12	Kruskal
	C3:1	Propenoylcarnitine	0.024 (±0.003)	0.022 (±0.004)	0.02 (±0.001)	0.550774	0.0658169	0.312597	0.08	ANOVA
	C4	Butyrylcarnitine	0.06 (0.062-0.068)	0.06 (0.053-0.064)	0.05 (0.052-0.057)	0.0688932	0.0210817	0.61314	0.0257	Kruskal
	C4:1	Butenylcarnitine	0.029 (±0.003)	0.026 (±0.002)	0.023 (±0.001)	0.078344	0.00144599	0.101793	0.0018	ANOVA
	C5	Valerylcarnitine	0.05 (±0.004)	0.049 (±0.006)	0.042 (±0.002)	0.992177	0.0241519	0.0327468	0.021	ANOVA
	C5-DC (and C6-OH)	Glutarylcarnitine	0.022 (±0.003)	0.022 (±0.003)	0.019 (±0.004)	0.999299	0.138833	0.139298	0.12	ANOVA
	C5-M-DC	Methylglutarylcarnitine	0.042 (±0.004)	0.04 (±0.003)	0.032 (±0.005)	0.533023	0.000288232	0.0028779	0.00038	ANOVA
	C5-OH (and C3-DC-M)	Hydroxyvalerylcarnitine	0.064 (±0.007)	0.066 (±0.006)	0.062 (±0.006)	0.82572	0.780473	0.502054	0.53	ANOVA
	C5:1	Tiglylcarnitine	0.077 (±0.007)	0.075 (±0.008)	0.067 (±0.003)	0.931662	0.0496595	0.0955316	0.052	ANOVA
	C5:1-DC	Glutaconylcarnitine	0.028 (±0.005)	0.029 (±0.005)	0.023 (±0.001)	0.945286	0.0741213	0.047196	0.046	ANOVA
	C6 (and C4:1-DC)	Hexanoylcarnitine	0.01 (±0.002)	0.01 (±0.001)	0.008 (±0.001)	0.940156	0.176959	0.286343	0.19	ANOVA
	C6:1	Hexenoylcarnitine	0.01 (0.01-0.011)	0.01 (0.01-0.012)	0.01 (0.01-0.011)	0.235553	0.845696	0.862736	0.367	Kruskal
	C7-DC	Pimeloylcarnitine	0.013 (±0.002)	0.015 (±0.002)	0.02 (±0.003)	0.39595	2.3544e-05	0.000388959	3.2e-05	ANOVA
	C8	Octanoylcarnitine	0.088 (±0.007)	0.086 (±0.006)	0.085 (±0.005)	0.764752	0.653132	0.947078	0.63	ANOVA
	C9	Nonaylcarnitine	0.018 (±0.002)	0.02 (±0.003)	0.017 (±0.001)	0.599942	0.524715	0.173406	0.2	ANOVA
	C10	Decanoylcarnitine	0.114 (±0.013)	0.106 (±0.006)	0.091 (±0.008)	0.14356	0.000644674	0.0310255	0.00095	ANOVA
	C10:1	Decenoylcarnitine	0.045 (±0.005)	0.043 (±0.005)	0.046 (±0.005)	0.794714	0.924829	0.652348	0.65	ANOVA
	C10:2	Decadienylcarnitine	0.115 (±0.008)	0.117 (±0.011)	0.106 (±0.007)	0.9032	0.164151	0.0915415	0.098	ANOVA
	C12	Dodecanoylcarnitine	0.03 (0.027-0.03)	0.03 (0.024-0.03)	0.02 (0.022-0.031)	1	0.448421	0.479186	0.539	Kruskal
	C12-DC	Dodecanedioylcarnitine	0.253 (±0.012)	0.251 (±0.033)	0.246 (±0.02)	0.981931	0.854331	0.922573	0.87	ANOVA
	C12:1	Dodecenoylcarnitine	0.05 (0.051-0.058)	0.06 (0.054-0.055)	0.05 (0.043-0.054)	0.576976	0.324962	0.0841703	0.161	Kruskal
	C14	Tetradecanoylcarnitine	0.02 (0.019-0.024)	0.02 (0.017-0.024)	0.02 (0.019-0.021)	0.45308	0.412351	1	0.443	Kruskal
	C14:1	Tetradecenoylcarnitine	0.014 (±0.002)	0.014 (±0.002)	0.014 (±0.001)	0.634611	0.83032	0.986346	0.64	ANOVA
	C14:1-OH	Hydroxytetradecenoylcarnitine	0.016 (±0.003)	0.015 (±0.002)	0.013 (±0.001)	0.624053	0.0261217	0.130631	0.034	ANOVA
	C14:2	Tetradecadienylcarnitine	0.015 (±0.001)	0.014 (±0.001)	0.013 (±0.002)	0.461571	0.0532868	0.321609	0.064	ANOVA
	C14:2-OH	Hydroxytetradecadienylcarnitine	0.017 (±0.003)	0.017 (±0.002)	0.016 (±0)	0.840137	0.630682	0.890414	0.64	ANOVA
	C16	Hexadecanoylcarnitine	0.038 (±0.005)	0.035 (±0.005)	0.035 (±0.003)	0.232859	0.398247	0.999024	0.21	ANOVA
	C16-OH	Hydroxyhexadecanoylcarnitine	0.03 (0.026-0.028)	0.03 (0.024-0.03)	0.02 (0.023-0.027)	1	0.201133	0.317867	0.309	Kruskal
	C16:1	Hexadecenoylcarnitine	0.025 (±0.002)	0.024 (±0.001)	0.023 (±0.002)	0.363966	0.108731	0.598581	0.11	ANOVA
	C16:1-OH	Hydroxyhexadecenoylcarnitine	0.019 (±0.002)	0.017 (±0.002)	0.016 (±0.002)	0.0612144	0.0479915	0.839515	0.024	ANOVA
	C16:2	Hexadecadienylcarnitine	0.01 (0.013-0.016)	0.01 (0.012-0.015)	0.01 (0.012-0.014)	0.312502	0.142785	0.783754	0.199	Kruskal
	C16:2-OH	Hydroxyhexadecadienylcarnitine	0.027 (±0.003)	0.025 (±0.003)	0.024 (±0.002)	0.206953	0.194752	0.929863	0.13	ANOVA
	C18	Octadecanoylcarnitine	0.01 (0.013-0.015)	0.01 (0.012-0.014)	0.01 (0.011-0.013)	0.334664	0.0353472	0.312743	0.0719	Kruskal
	C18:1	Octadecenoylcarnitine	0.065 (±0.007)	0.062 (±0.007)	0.056 (±0.004)	0.532131	0.0542193	0.282085	0.067	ANOVA
	C18:1-OH	Hydroxyoctadecenoylcarnitine	0.07 (0.062-0.066)	0.06 (0.054-0.065)	0.05 (0.051-0.056)	0.277745	0.00626318	0.116635	0.0161	Kruskal
	C18:2	Octadecadienylcarnitine	0.015 (±0.002)	0.012 (±0.002)	0.011 (±0.002)	0.0149085	0.0213898	0.91009	0.0062	ANOVA
	Amino acids and derivatives
	Ala	Alanine	117.318 (±13.331)	114.77 (±9.059)	104.667 (±6.512)	0.852659	0.0977993	0.224025	0.11	ANOVA
	Arg	Arginine	113.909 (±15.907)	115.98 (±12.674)	119 (±6.55)	0.933833	0.76421	0.911614	0.78	ANOVA
	Asn	Asparagine	79.109 (±8.686)	79.39 (±7.589)	81.033 (±5.32)	0.996226	0.890643	0.921237	0.9	ANOVA
	Asp	Aspartate	409 (387-425.5)	413.5 (382-457.25)	415 (412-468)	0.641578	0.324419	0.837895	0.439	Kruskal
	Cit	Citrulline	0	0	0	1	1	1	1	0
	Gln	Glutamine	18.557 (±9.532)	13.714 (±7.421)	3.707 (±0.281)	0.348257	0.00498364	0.0703511	0.007	ANOVA
	Glu	Glutamate	95.645 (±9.962)	97.78 (±8.612)	100.6 (±5.601)	0.845217	0.55827	0.829766	0.58	ANOVA
	Gly	Glycine	3130 (±339.971)	3112 (±260.333)	3166.667 (±230.937)	0.98919	0.970863	0.93835	0.94	ANOVA
	His	Histidine	46.427 (±6.664)	45.7 (±4.152)	51.633 (±4.005)	0.948543	0.19276	0.13064	0.13	ANOVA
	Ile	Isoleucine	235.818 (±34.71)	237.6 (±27.183)	228 (±21.05)	0.989756	0.878661	0.828122	0.84	ANOVA
	Leu	Leucine	237.364 (±29.554)	239.8 (±27.071)	241.667 (±23.004)	0.977679	0.95489	0.991597	0.95	ANOVA
	Lys	Lysine	347.182 (±45.259)	345.1 (±28.113)	334.333 (±13.738)	0.989903	0.778182	0.842469	0.79	ANOVA
	Met	Methionine	50.009 (±6.816)	49.81 (±5.038)	52 (±3.691)	0.996485	0.795617	0.765085	0.76	ANOVA
	Orn	Ornithine	1 (9.09 %)	0 (0 %)	0 (0 %)	1	1	1	0.49	Chi-square
	Phe	Phenylalanine	101.427 (±13.501)	101.35 (±9.985)	98.867 (±5.008)	0.999859	0.904072	0.91209	0.9	ANOVA
	Pro	Proline	96.3 (±11.743)	95.77 (±7.968)	96.133 (±6.209)	0.991177	0.999425	0.997352	0.99	ANOVA
	Ser	Serine	100.255 (±15.513)	98.99 (±10.572)	102.3 (±8.898)	0.971957	0.95238	0.883861	0.89	ANOVA
	Thr	Threonine	113.5 (±12.644)	121.7 (±12.885)	205.667 (±43.452)	0.662718	1.42289e-07	8.60407e-07	1.2e-07	ANOVA
	Trp	Tryptophan	17.2 (±2.238)	17.74 (±1.713)	17.733 (±1.388)	0.796507	0.863975	0.999978	0.78	ANOVA
	Tyr	Tyrosine	102.1 (±12.446)	102.03 (±10.454)	101.767 (±8.078)	0.999884	0.998268	0.998951	1	ANOVA
	Val	Valine	200.818 (±25.783)	199 (±20.445)	199.333 (±9.076)	0.979781	0.991095	0.999563	0.98	ANOVA
	Ac-Orn	Acetylornithine	0.19 (0.09-0.192)	0.19 (0.046-0.196)	0.13 (0.125-0.186)	1	0.986285	0.714801	0.775	Kruskal
	ADMA	Asymmetric dimethylarginine	0 (0 %)	1 (10 %)	0 (0 %)	1	1	1	0.44	Chi-square
	alpha-AAA	alpha-Aminoadipic acid	1 (9.09 %)	1 (10 %)	0 (0 %)	1	1	1	0.77	Chi-square
	c4-OH-Pro	cis-4-Hydroxyproline	0	0	0	1	1	1	1	0
	Carnosine		0	0	0	1	1	1	1	0
	Creatinine		0	0	0	1	1	1	1	0
	DOPA	Dihydroxyphenylalanine	7 (63.64 %)	2 (20 %)	0 (0 %)	1	1	1	0.021	Chi-square
	Dopamine		0	0	0	1	1	1	1	0
	Histamine		3 (27.27 %)	5 (50 %)	3 (60 %)	1	1	1	0.39	Chi-square
	Kynurenine		4 (36.36 %)	3 (30 %)	0 (0 %)	1	1	1	0.3	Chi-square
	Met-SO	Methionine sulfoxide	1.1 (±0.257)	0.98 (±0.274)	0.331 (±0.274)	0.563864	5.74752e-05	0.000534882	7.1e-05	ANOVA
	Nitro-Tyr	Nitrotyrosine	0	0	0	1	1	1	1	0
	PEA	Phenylethylamine	0	0	0	1	1	1	1	0
	Putrescine		4 (36.36 %)	3 (30 %)	3 (60 %)	1	1	1	0.52	Chi-square
	SDMA	Symmetric dimethylarginine	0	0	0	1	1	1	1	0
	Serotonin		0	0	0	1	1	1	1	0
	Spermidine		10 (90.91 %)	2 (20 %)	0 (0 %)	1	1	1	0.00035	Chi-square
	Spermine		0	0	0	1	1	1	1	0
	t4-OH-Pro	trans-4-Hydroxyproline	0	0	0	1	1	1	1	0
	Taurine		0	0	0	1	1	1	1	0
	total-DMA	ADMA+SDMA	1 (9.09 %)	0 (0 %)	0 (0 %)	1	1	1	0.49	Chi-square
	Phosphatidylcholines (PC aa), plasmalogens (PC ae) and lysophosphatidylcholines (lysoPC a)
	lysoPC a C14:0		4.998 (±0.153)	4.948 (±0.075)	5.027 (±0.129)	0.629593	0.905252	0.489237	0.47	ANOVA
	lysoPC a C16:0		0.914 (±0.132)	0.978 (±0.126)	0.929 (±0.101)	0.478911	0.973929	0.75283	0.5	ANOVA
	lysoPC a C16:1		0.05 (0.052-0.06)	0.06 (0.055-0.069)	0.06 (0.056-0.06)	0.218451	0.687395	1	0.34	Kruskal
	lysoPC a C17:0		0.06 (0.058-0.066)	0.07 (0.066-0.087)	0.08 (0.076-0.087)	0.0315577	0.0585912	1	0.0311	Kruskal
	lysoPC a C18:0		0.462 (±0.064)	0.52 (±0.073)	0.483 (±0.033)	0.115365	0.814888	0.548044	0.13	ANOVA
	lysoPC a C18:1		0.189 (±0.026)	0.194 (±0.026)	0.219 (±0.028)	0.878095	0.111903	0.234292	0.13	ANOVA
	lysoPC a C18:2		0.43 (0.389-0.458)	0.43 (0.41-0.445)	0.62 (0.521-0.755)	1	0.0056181	0.00872382	0.00835	Kruskal
	lysoPC a C20:3		0.031 (±0.007)	0.029 (±0.007)	0.024 (±0.009)	0.843713	0.229085	0.452093	0.26	ANOVA
	lysoPC a C20:4		0.03 (0.02-0.029)	0.03 (0.022-0.035)	0.01 (0.014-0.016)	0.780785	0.00603986	0.00123544	0.00263	Kruskal
	lysoPC a C24:0		0.069 (±0.015)	0.074 (±0.019)	0.083 (±0.005)	0.821513	0.238922	0.486285	0.27	ANOVA
	lysoPC a C26:0		0.014 (±0.004)	0.014 (±0.004)	0.018 (±0.004)	0.999942	0.121883	0.127245	0.11	ANOVA
	lysoPC a C26:1		0.011 (±0.005)	0.01 (±0.005)	0.014 (±0.004)	0.866562	0.597637	0.371984	0.4	ANOVA
	lysoPC a C28:0		0.035 (±0.007)	0.035 (±0.011)	0.041 (±0.005)	0.987024	0.338385	0.412796	0.34	ANOVA
	lysoPC a C28:1		0.006 (±0.003)	0.007 (±0.003)	0.008 (±0.003)	0.869181	0.75118	0.948326	0.75	ANOVA
	PC aa C24:0		0.01 (±0.002)	0.012 (±0.002)	0.011 (±0.003)	0.063309	0.765005	0.456114	0.076	ANOVA
	PC aa C26:0		0.248 (±0.009)	0.254 (±0.009)	0.255 (±0.005)	0.260196	0.275164	0.961717	0.18	ANOVA
	PC aa C28:1		0.008 (±0.003)	0.009 (±0.003)	0.015 (±0.001)	0.416953	0.000134737	0.00203448	0.00019	ANOVA
	PC aa C30:0		0.041 (±0.004)	0.044 (±0.005)	0.049 (±0.006)	0.521299	0.0098086	0.0749238	0.013	ANOVA
	PC aa C30:2		0 (0.001-0.002)	0 (0.001-0.002)	0 (0-0.001)	0.488115	0.677379	0.190603	0.29	Kruskal
	PC aa C32:0		0.01 (0.007-0.011)	0.01 (0.008-0.011)	0.01 (0.005-0.006)	0.969155	0.0058388	0.00199819	0.00363	Kruskal
	PC aa C32:1		0.005 (±0.003)	0.006 (±0.002)	0.006 (±0)	0.7954	0.679091	0.946623	0.66	ANOVA
	PC aa C32:2		0.003 (±0.001)	0.004 (±0.002)	0.005 (±0.001)	0.875475	0.288755	0.506142	0.32	ANOVA
	PC aa C32:3		0.003 (±0.002)	0.003 (±0.002)	0.004 (±0.001)	0.999912	0.449583	0.454484	0.42	ANOVA
	PC aa C34:1		0.02 (0.018-0.022)	0.02 (0.015-0.02)	0.02 (0.015-0.021)	0.424546	0.797341	1	0.547	Kruskal
	PC aa C34:2		0.01 (0.01-0.013)	0.01 (0.01-0.011)	0.02 (0.015-0.017)	0.492381	0.0179398	0.00170186	0.00458	Kruskal
	PC aa C34:3		0.002 (±0.002)	0.003 (±0.001)	0.003 (±0)	0.968468	0.956294	0.99572	0.95	ANOVA
	PC aa C34:4		0.006 (±0.002)	0.003 (±0.001)	0.005 (±0.002)	0.0318645	0.669731	0.399603	0.04	ANOVA
	PC aa C36:0		0.1 (±0.007)	0.098 (±0.008)	0.107 (±0.012)	0.842463	0.35784	0.184034	0.21	ANOVA
	PC aa C36:1		0.01 (0.009-0.01)	0.01 (0.008-0.013)	0.01 (0.011-0.011)	0.934255	0.378875	0.193153	0.312	Kruskal
	PC aa C36:2		0.053 (±0.008)	0.051 (±0.005)	0.054 (±0.008)	0.800482	0.959154	0.718418	0.7	ANOVA
	PC aa C36:3		0.004 (±0.002)	0.003 (±0.002)	0.005 (±0.002)	0.565175	0.863331	0.391939	0.37	ANOVA
	PC aa C36:4		0.005 (±0.001)	0.005 (±0.002)	0.003 (±0.002)	0.997096	0.278838	0.315355	0.27	ANOVA
	PC aa C36:5		0 (0.002-0.004)	0 (0.001-0.003)	0 (0.001-0.002)	0.232076	0.0949002	0.731767	0.133	Kruskal
	PC aa C36:6		0.001 (±0.001)	0.003 (±0.002)	0.002 (±0.002)	0.0879178	0.856055	0.436481	0.1	ANOVA
	PC aa C38:0		0.008 (±0.002)	0.008 (±0.003)	0.01 (±0.001)	0.572611	0.12311	0.462262	0.14	ANOVA
	PC aa C38:1		0.003 (±0.002)	0.004 (±0.002)	0.004 (±0.001)	0.826137	0.80052	0.986473	0.76	ANOVA
	PC aa C38:3		0.002 (±0.001)	0.003 (±0.001)	0.001 (±0)	0.517703	0.216708	0.0420485	0.053	ANOVA
	PC aa C38:4		0.005 (±0.002)	0.005 (±0.002)	0.003 (±0.001)	0.445717	0.0885869	0.463208	0.1	ANOVA
	PC aa C38:5		0.006 (±0.002)	0.005 (±0.002)	0.005 (±0.002)	0.601974	0.714757	1	0.57	ANOVA
	PC aa C38:6		0 (0.002-0.004)	0 (0.003-0.005)	0 (0.001-0.002)	0.743183	0.040314	0.00969512	0.0216	Kruskal
	PC aa C40:1		0.127 (±0.014)	0.131 (±0.006)	0.151 (±0.015)	0.65934	0.00280475	0.0167512	0.0036	ANOVA
	PC aa C40:2		0.003 (±0.001)	0.003 (±0.001)	0.002 (±0.001)	0.963848	0.795017	0.902537	0.81	ANOVA
	PC aa C40:3		0.002 (±0.001)	0.002 (±0.001)	0.002 (±0.001)	0.998183	0.888115	0.870154	0.87	ANOVA
	PC aa C40:4		0.004 (±0.002)	0.004 (±0.001)	0.003 (±0)	0.912357	0.454862	0.297904	0.32	ANOVA
	PC aa C40:5		0	0	0	1	1	1	1	0
	PC aa C40:6		0.093 (±0.006)	0.093 (±0.005)	0.093 (±0.004)	0.979958	0.986797	1	0.98	ANOVA
	PC aa C42:0		0.014 (±0.003)	0.013 (±0.002)	0.014 (±0.003)	0.323133	0.998973	0.456231	0.29	ANOVA
	PC aa C42:1		0.009 (±0.002)	0.014 (±0.003)	0.013 (±0.002)	0.00132001	0.0256593	0.883085	0.0012	ANOVA
	PC aa C42:2		0.016 (±0.002)	0.018 (±0.004)	0.015 (±0.002)	0.253894	0.806088	0.156107	0.13	ANOVA
	PC aa C42:4		0.003 (±0.001)	0.004 (±0.002)	0.002 (±0.001)	0.313596	0.851863	0.218463	0.18	ANOVA
	PC aa C42:5		0 (0.002-0.004)	0 (0-0.003)	0 (0.003-0.005)	0.344187	0.469037	0.0762567	0.136	Kruskal
	PC aa C42:6		0.045 (±0.007)	0.054 (±0.01)	0.061 (±0.004)	0.053443	0.00273617	0.211383	0.0027	ANOVA
	PC ae C30:0		0.029 (±0.003)	0.033 (±0.003)	0.041 (±0.005)	0.021049	4.0347e-06	0.00142866	6.7e-06	ANOVA
	PC ae C30:1		0.002 (±0.002)	0.002 (±0.002)	0.001 (±0)	0.744439	0.634497	0.313119	0.34	ANOVA
	PC ae C30:2		0 (0.001-0.002)	0 (0.001-0.002)	0 (0.001-0.001)	0.612955	0.21223	0.645454	0.326	Kruskal
	PC ae C32:1		0 (0.002-0.003)	0 (0-0.003)	0 (0.001-0.002)	0.561414	0.742521	1	0.63	Kruskal
	PC ae C32:2		0.011 (±0.002)	0.01 (±0.002)	0.01 (±0.001)	0.71529	0.936739	0.955601	0.74	ANOVA
	PC ae C34:0		0.004 (±0.002)	0.005 (±0.001)	0.005 (±0.001)	0.815754	0.842655	0.997759	0.78	ANOVA
	PC ae C34:1		0.006 (±0.002)	0.004 (±0.002)	0.005 (±0)	0.107362	0.451855	0.877581	0.12	ANOVA
	PC ae C34:2		0 (0.002-0.003)	0 (0.003-0.003)	0 (0.002-0.003)	0.177948	1	0.161003	0.17	Kruskal
	PC ae C34:3		0 (0.002-0.003)	0 (0.003-0.004)	0 (0.003-0.003)	0.00693162	0.521915	0.272737	0.0179	Kruskal
	PC ae C36:0		0.042 (±0.004)	0.042 (±0.003)	0.039 (±0.003)	0.969478	0.231179	0.322084	0.24	ANOVA
	PC ae C36:1		0.02 (±0.004)	0.017 (±0.002)	0.018 (±0.004)	0.0884293	0.508593	0.785863	0.1	ANOVA
	PC ae C36:2		0.01 (0.012-0.014)	0.01 (0.011-0.015)	0.01 (0.011-0.013)	1	1	1	0.937	Kruskal
	PC ae C36:3		0 (0-0.002)	0 (0-0.002)	0 (0.001-0.001)	1	0.388782	0.485278	0.505	Kruskal
	PC ae C36:4		0.006 (±0.002)	0.007 (±0.002)	0.005 (±0.001)	0.633986	0.88968	0.472079	0.46	ANOVA
	PC ae C36:5		0 (0.002-0.004)	0 (0.001-0.003)	0 (0.003-0.004)	0.0923551	0.643767	0.0348317	0.0455	Kruskal
	PC ae C38:0		0.042 (±0.003)	0.043 (±0.003)	0.044 (±0.004)	0.816182	0.607427	0.889997	0.62	ANOVA
	PC ae C38:1		0.004 (±0.002)	0.005 (±0.003)	0.003 (±0.001)	0.944749	0.7081	0.558608	0.58	ANOVA
	PC ae C38:2		0 (0.004-0.005)	0 (0.003-0.006)	0 (0.003-0.005)	0.938826	0.743572	1	0.77	Kruskal
	PC ae C38:3		0.006 (±0.002)	0.005 (±0.002)	0.004 (±0.001)	0.705092	0.0627749	0.22034	0.077	ANOVA
	PC ae C38:4		0.008 (±0.003)	0.007 (±0.002)	0.007 (±0.001)	0.838154	0.750261	0.962802	0.73	ANOVA
	PC ae C38:5		0.005 (±0.001)	0.005 (±0.002)	0.007 (±0.001)	0.941907	0.0129052	0.0260373	0.013	ANOVA
	PC ae C38:6		4 (36.36 %)	7 (70 %)	3 (60 %)	1	1	1	0.29	Chi-square
	PC ae C40:1		0.005 (±0.001)	0.005 (±0.001)	0.004 (±0.002)	0.996645	0.452132	0.498866	0.45	ANOVA
	PC ae C40:2		0 (0.002-0.004)	0 (0.002-0.004)	0 (0.003-0.003)	1	0.975133	0.960948	0.881	Kruskal
	PC ae C40:3		0.002 (±0.002)	0.003 (±0.002)	0.002 (±0.002)	0.730012	0.865383	0.5158	0.52	ANOVA
	PC ae C40:4		0.019 (±0.004)	0.017 (±0.002)	0.017 (±0.002)	0.224762	0.196039	0.915968	0.13	ANOVA
	PC ae C40:5		0.002 (±0.001)	0.003 (±0.002)	0.003 (±0.001)	0.398583	0.154055	0.680419	0.15	ANOVA
	PC ae C40:6		0.005 (±0.001)	0.005 (±0.002)	0.005 (±0.003)	0.854377	0.843951	0.992008	0.81	ANOVA
	PC ae C42:0		0.208 (±0.012)	0.208 (±0.016)	0.223 (±0.006)	0.997147	0.111155	0.105947	0.091	ANOVA
	PC ae C42:1		0.028 (±0.006)	0.027 (±0.003)	0.03 (±0.005)	0.948361	0.705243	0.56111	0.59	ANOVA
	PC ae C42:2		0 (0.002-0.004)	0 (0.002-0.005)	0 (0.002-0.004)	0.23635	1	0.465783	0.33	Kruskal
	PC ae C42:3		0.003 (±0.001)	0.003 (±0.001)	0.003 (±0.002)	0.932094	0.879995	0.980261	0.88	ANOVA
	PC ae C42:4		0	0	0	1	1	1	1	0
	PC ae C42:5		0.227 (±0.015)	0.22 (±0.012)	0.226 (±0.008)	0.433674	0.98529	0.682341	0.44	ANOVA
	PC ae C44:3		0.013 (±0.003)	0.013 (±0.004)	0.013 (±0.004)	0.981784	0.999404	0.982675	0.98	ANOVA
	PC ae C44:4		0.027 (±0.004)	0.023 (±0.003)	0.025 (±0.003)	0.0598167	0.704471	0.501613	0.073	ANOVA
	PC ae C44:5		0.02 (±0.005)	0.018 (±0.004)	0.023 (±0.004)	0.363603	0.495786	0.0860585	0.094	ANOVA
	PC ae C44:6		0.018 (±0.004)	0.017 (±0.003)	0.02 (±0.004)	0.931976	0.684326	0.517818	0.55	ANOVA
	Sphingomyelins and hydroxysphingomyelins
	SM-OH C14:1		0.015 (±0.004)	0.014 (±0.006)	0.019 (±0.003)	0.740021	0.262579	0.0966315	0.11	ANOVA
	SM-OH C16:1		4 (36.36 %)	4 (40 %)	2 (40 %)	1	1	1	0.98	Chi-square
	SM-OH C22:1		0 (0.001-0.006)	0 (0.003-0.005)	0 (0.004-0.004)	1	0.756986	0.598724	0.695	Kruskal
	SM-OH C22:2		6 (54.55 %)	5 (50 %)	5 (100 %)	1	1	1	0.14	Chi-square
	SM-OH C24:1		0.003 (±0.002)	0.003 (±0.002)	0.003 (±0.001)	0.947159	0.991936	0.990546	0.95	ANOVA
	SM C16:0		0.015 (±0.004)	0.014 (±0.002)	0.017 (±0.003)	0.469652	0.510281	0.121487	0.14	ANOVA
	SM C16:1		0.004 (±0.002)	0.003 (±0.002)	0.003 (±0.001)	0.501044	0.542299	0.988522	0.43	ANOVA
	SM C18:0		0 (0.003-0.006)	0 (0.001-0.005)	0 (0.002-0.003)	0.0848762	0.28442	1	0.134	Kruskal
	SM C18:1		7 (63.64 %)	4 (40 %)	3 (60 %)	1	1	1	0.53	Chi-square
	SM C20:2		4 (36.36 %)	8 (80 %)	1 (20 %)	1	1	1	0.045	Chi-square
	SM C22:3		5 (45.45 %)	4 (40 %)	3 (60 %)	1	1	1	0.76	Chi-square
	SM C24:0		0.009 (±0.005)	0.008 (±0.004)	0.01 (±0.001)	0.717864	0.896703	0.54623	0.54	ANOVA
	SM C24:1		0.01 (±0.004)	0.012 (±0.004)	0.008 (±0.001)	0.448021	0.442784	0.0921127	0.11	ANOVA
	SM C26:0		0.01 (0.004-0.01)	0.01 (0.006-0.008)	0.01 (0.008-0.01)	1	0.650034	0.506394	0.621	Kruskal
	SM C26:1		5 (45.45 %)	4 (40 %)	3 (60 %)	1	1	1	0.76	Chi-square
	Other
	Hexoses		675.364 (±83.331)	678 (±66.26)	818.667 (±46.785)	0.996086	0.00315121	0.00424836	0.0024	ANOVA
	Metabolic indexes
	(C2+C3)/C0		0.21 (0.208-0.22)	0.2 (0.19-0.208)	0.2 (0.199-0.211)	0.016636	0.125394	1	0.0285	Kruskal
	aromatic amino acids		220.727 (±27.857)	221.2 (±21.979)	218.333 (±14.312)	0.998852	0.980879	0.973521	0.97	ANOVA
	ADMA/Arg		0 (0 %)	1 (10 %)	0 (0 %)	1	1	1	0.44	Chi-square
	BCAA	Val+Ile+Leu	674 (±89.012)	676.4 (±73.711)	669 (±52.305)	0.997253	0.992198	0.983508	0.99	ANOVA
	C2/C0		0.17 (0.174-0.183)	0.16 (0.156-0.168)	0.17 (0.164-0.169)	0.00947616	0.129624	0.936184	0.0186	Kruskal
	Cit/Arg		0	0	0	1	1	1	1	0
	Cit/Orn		0	0	0	1	1	1	1	0
	CPT I ratio	C0/(C16+C18)	0.036 (±0.006)	0.031 (±0.003)	0.034 (±0.002)	0.0862015	0.680184	0.613364	0.1	ANOVA
	Essential AA	His + Ile + Leu + Lys + Met + Phe + Thr + Trp + Val	1303.545 (±165.726)	1312.1 (±126.424)	1377.667 (±113.935)	0.989725	0.608263	0.684305	0.62	ANOVA
	Fischer ratio	(Ile+Leu+Val) /(Phe+Trp+Tyr)	3.1 (3.025-3.105)	3.05 (3.015-3.078)	3.04 (3.034-3.086)	0.75266	1	1	0.798	Kruskal
	Glucogenic amino acids	Ala + Arg + Asn +Asp + Cys + Gln+ Glu + Gly + His+ Met + Pro + Ser+ Thr + Val	3347.636 (±362.905)	3325.7 (±271.373)	3373.667 (±245.708)	0.985724	0.9868	0.95725	0.96	ANOVA
	Kynurenine / Trp		4 (36.36 %)	3 (30 %)	0 (0 %)	1	1	1	0.3	Chi-square
	Met-SO / Met		0.022 (±0.005)	0.02 (±0.007)	0.006 (±0.005)	0.645292	8.69648e-05	0.000621373	0.0001	ANOVA
	MUFA PC	Sum of PCs with monounsaturated fatty acid residues	0.24 (0.23-0.262)	0.25 (0.241-0.26)	0.27 (0.257-0.297)	1	0.0428937	0.0963415	0.0804	Kruskal
	MUFA PC / SFA PC		0.32 (0.308-0.343)	0.32 (0.313-0.336)	0.34 (0.318-0.376)	1	0.319063	0.384677	0.425	Kruskal
	Non-essential AA	Ala + Arg + Asn + Asp + Cys + Gln + Glu + Gly + Pro + Ser + Tyr	4297.182 (±457.827)	4297.2 (±362.006)	4359 (±267.146)	1	0.954398	0.955771	0.95	ANOVA
	Orn / Arg		1 (9.09 %)	0 (0 %)	0 (0 %)	1	1	1	0.49	Chi-square
	PUFA PC	Sum of PCs with polyunsaturated fatty acid residues	0.685 (±0.027)	0.678 (±0.023)	0.695 (±0.023)	0.769217	0.725412	0.403583	0.43	ANOVA
	PUFA PC / MUFA PC		2.752 (±0.259)	2.723 (±0.109)	2.517 (±0.215)	0.944531	0.105843	0.17915	0.11	ANOVA
	PUFA PC / SFA PC		0.907 (±0.035)	0.882 (±0.035)	0.866 (±0.029)	0.252096	0.0939097	0.673292	0.084	ANOVA
	Putrescine / Orn		1 (9.09 %)	0 (0 %)	0 (0 %)	1	1	1	0.49	Chi-square
	SDMA / Arg		0	0	0	1	1	1	1	0
	Serotonin / Trp		0	0	0	1	1	1	1	0
	SFA PC	Sum of PCs with only saturated fatty acid residues	0.756 (±0.017)	0.768 (±0.024)	0.802 (±0.015)	0.344062	0.000751449	0.0135868	0.0011	ANOVA
	Spermidine / Putrescine		4 (36.36 %)	2 (20 %)	0 (0 %)	1	1	1	0.27	Chi-square
	Spermine / Spermidine		0	0	0	1	1	1	1	0
	Total PC + SM		1.773 (±0.057)	1.768 (±0.043)	1.853 (±0.035)	0.972826	0.0137803	0.0101725	0.0083	ANOVA
	Total amino acids		5600.545 (±620.82)	5609.5 (±486.609)	5737 (±338.763)	0.999174	0.882324	0.899346	0.88	ANOVA
	Total AC / C0	Ratio of the sum of all acylcarnitines to free carnitine	1.305 (±0.124)	1.216 (±0.04)	1.243 (±0.078)	0.0909084	0.444234	0.850592	0.1	ANOVA
	Total AC DC / Total AC	Ratio of all dicarboxylicacylcarnitines to all acylcarnitines	0.188 (±0.008)	0.192 (±0.005)	0.198 (±0.006)	0.376388	0.0354429	0.29211	0.043	ANOVA
	Total AC-OH / Total AC	Ratio of hydroxylated and nonhydroxylated acylcarnitines	0.117 (±0.006)	0.115 (±0.005)	0.112 (±0.003)	0.564932	0.102665	0.41499	0.12	ANOVA
	Total DMA / Arg		0 (0 %)	1 (10 %)	0 (0 %)	1	1	1	0.44	Chi-square
	Total lysoPC		7.29 (±0.31)	7.426 (±0.35)	7.63 (±0.335)	0.620386	0.159599	0.508095	0.18	ANOVA
	Total lysoPC / Total PC		4.315 (±0.268)	4.388 (±0.286)	4.3 (±0.138)	0.79739	0.993209	0.808843	0.76	ANOVA
	Total PC		1.693 (±0.063)	1.695 (±0.043)	1.777 (±0.03)	0.994289	0.0150989	0.0201743	0.013	ANOVA
	Total PC aa		0.88 (0.863-0.909)	0.9 (0.898-0.913)	0.97 (0.949-0.973)	0.354898	0.00323177	0.0566901	0.00904	Kruskal
	Total PC ae		0.8 (±0.023)	0.788 (±0.029)	0.817 (±0.018)	0.512455	0.409823	0.0975708	0.11	ANOVA
	Total SM		0.08 (±0.011)	0.073 (±0.01)	0.081 (±0.005)	0.214113	0.975229	0.268346	0.16	ANOVA
	Total SM / Total (SM+PC)		0.04 (0.04-0.05)	0.04 (0.036-0.044)	0.04 (0.042-0.046)	0.173544	1	0.368281	0.249	Kruskal
	Total SM / Total PC		0.05 (0.041-0.053)	0.04 (0.038-0.046)	0.04 (0.044-0.048)	0.184216	1	0.413923	0.27	Kruskal
	Total SMnonOH		0.055 (±0.008)	0.05 (±0.007)	0.052 (±0.004)	0.250733	0.770488	0.808211	0.28	ANOVA
	Total SM-OH		0.025 (±0.005)	0.023 (±0.008)	0.03 (±0.003)	0.662788	0.36447	0.120525	0.14	ANOVA
	Total SM-OH / Total SMnonOH	Ratio of hydroxylated and nonhydroxylated sphingomyelins	0.47 (±0.108)	0.477 (±0.173)	0.575 (±0.044)	0.991716	0.320899	0.380479	0.32	ANOVA
	Tyr/Phe		1.009 (±0.048)	1.007 (±0.024)	1.03 (±0.037)	0.994941	0.563145	0.526483	0.52	ANOVA
